# Supplementary material for: Modifying conformational distribution of chiral tetrahydro-2-furoic acid through its interaction with water: a rotational spectroscopic and theoretical investigation
Source: Royal Society of Chemistry journal article supplement (doi:10.1039/d0cp06265k), 2021-01-01
Supplement: d0cp06265k1.pdf [file d0cp06265k1.pdf]

# **Modifying conformational distribution of chiral tetrahydro-2-furoic acid through its interaction with water: a rotational spectroscopic and theoretical investigation**

Fan Xie, Sethupathy Mahendiran, Nathan A. Seifert, and Yunjie Xu\*

\* Corresponding Authors, Email: yunjie.xu@ualberta.ca

## **Supplementary Information**

### **Table of Contents**

|                                                                                                        |       |
|--------------------------------------------------------------------------------------------------------|-------|
| <b>Table S1-S2.</b> Experimental transition frequencies of the two THFA-water conformers observed..... | S2-S3 |
| <b>Point S1.</b> Estimate the anticipated signal-to-noise ratio of the <b>III</b> -1 structure .....   | S4    |

**Table S1.** Measured transition frequencies of II-9.

| J' | K <sub>a</sub> ' | K <sub>c</sub> ' | J'' | K <sub>a</sub> '' | K <sub>c</sub> '' | $\nu_{\text{EXP}} / \text{MHz}$ | $\Delta\nu^{[a]} / \text{MHz}$ |
|----|------------------|------------------|-----|-------------------|-------------------|---------------------------------|--------------------------------|
| 1  | 0                | 1                | 0   | 0                 | 0                 | 2096.6412                       | 0.0029                         |
| 3  | 2                | 1                | 3   | 1                 | 2                 | 2405.2128                       | 0.0018                         |
| 4  | 2                | 2                | 4   | 1                 | 3                 | 2479.8702                       | 0.0077                         |
| 2  | 2                | 0                | 2   | 1                 | 1                 | 2550.9933                       | 0.0063                         |
| 1  | 1                | 1                | 0   | 0                 | 0                 | 2922.2378                       | -0.0058                        |
| 4  | 1                | 3                | 4   | 1                 | 4                 | 3070.8364                       | 0.0058                         |
| 4  | 1                | 3                | 4   | 0                 | 4                 | 3243.2332                       | 0.0040                         |
| 2  | 0                | 2                | 1   | 1                 | 1                 | 3293.4864                       | 0.0013                         |
| 2  | 2                | 1                | 2   | 1                 | 2                 | 3421.0004                       | -0.0023                        |
| 6  | 3                | 3                | 6   | 2                 | 4                 | 3660.0940                       | 0.0052                         |
| 6  | 2                | 4                | 6   | 1                 | 5                 | 3665.2280                       | -0.0020                        |
| 7  | 3                | 4                | 7   | 2                 | 5                 | 3708.4830                       | 0.0014                         |
| 2  | 1                | 2                | 1   | 1                 | 1                 | 3878.5427                       | 0.0036                         |
| 5  | 3                | 2                | 5   | 2                 | 3                 | 3908.9209                       | 0.0021                         |
| 3  | 2                | 2                | 3   | 1                 | 3                 | 3935.0608                       | -0.0062                        |
| 2  | 0                | 2                | 1   | 0                 | 1                 | 4119.0923                       | 0.0018                         |
| 3  | 2                | 2                | 3   | 0                 | 3                 | 4279.1002                       | -0.0038                        |
| 4  | 3                | 1                | 4   | 2                 | 2                 | 4288.1001                       | 0.0022                         |
| 2  | 1                | 1                | 1   | 1                 | 0                 | 4507.9960                       | -0.0042                        |
| 3  | 3                | 0                | 3   | 2                 | 1                 | 4620.8580                       | 0.0010                         |
| 4  | 2                | 3                | 4   | 1                 | 4                 | 4626.5661                       | 0.0049                         |
| 2  | 1                | 2                | 1   | 0                 | 1                 | 4704.1443                       | -0.0001                        |
| 4  | 2                | 3                | 4   | 0                 | 4                 | 4798.9540                       | -0.0058                        |
| 3  | 3                | 1                | 3   | 2                 | 2                 | 4956.7762                       | -0.0024                        |
| 4  | 3                | 2                | 4   | 2                 | 3                 | 5135.8011                       | 0.0003                         |
| 3  | 0                | 3                | 2   | 1                 | 2                 | 5431.7885                       | 0.0005                         |
| 5  | 3                | 3                | 5   | 2                 | 4                 | 5459.4390                       | -0.0051                        |
| 5  | 2                | 4                | 5   | 1                 | 5                 | 5480.2012                       | 0.0025                         |
| 7  | 4                | 3                | 7   | 3                 | 4                 | 5646.3659                       | -0.0035                        |
| 3  | 1                | 3                | 2   | 1                 | 2                 | 5775.8281                       | 0.0031                         |
| 3  | 0                | 3                | 2   | 0                 | 2                 | 6016.8418                       | -0.0002                        |
| 6  | 4                | 2                | 6   | 3                 | 3                 | 6149.3160                       | 0.0030                         |
| 3  | 2                | 2                | 2   | 2                 | 1                 | 6289.8866                       | -0.0027                        |
| 3  | 1                | 3                | 2   | 0                 | 2                 | 6360.8789                       | -0.0001                        |
| 3  | 2                | 1                | 2   | 2                 | 0                 | 6562.9311                       | 0.0002                         |
| 3  | 1                | 2                | 2   | 1                 | 1                 | 6708.7057                       | -0.0012                        |
| 6  | 1                | 5                | 6   | 0                 | 6                 | 5883.7272                       | -0.0004                        |
| 6  | 3                | 4                | 6   | 2                 | 5                 | 5954.8264                       | -0.0027                        |

[a]  $\Delta\nu = \nu_{\text{exp}} - \nu_{\text{cacl}}$ .

**Table S2.** Measured transition frequencies of I-10.

| J' | K <sub>a</sub> ' | K <sub>c</sub> ' | J'' | K <sub>a</sub> '' | K <sub>c</sub> '' | $\nu_{\text{EXP}} / \text{MHz}$ | $\Delta\nu^{[a]} / \text{MHz}$ |
|----|------------------|------------------|-----|-------------------|-------------------|---------------------------------|--------------------------------|
| 1  | 0                | 1                | 0   | 0                 | 0                 | 2096.6412                       | 0.0029                         |
| 3  | 2                | 1                | 3   | 1                 | 2                 | 2405.2128                       | 0.0018                         |
| 4  | 2                | 2                | 4   | 1                 | 3                 | 2479.8702                       | 0.0077                         |
| 2  | 2                | 0                | 2   | 1                 | 1                 | 2550.9933                       | 0.0063                         |
| 1  | 1                | 1                | 0   | 0                 | 0                 | 2922.2378                       | -0.0058                        |
| 4  | 1                | 3                | 4   | 1                 | 4                 | 3070.8364                       | 0.0058                         |
| 4  | 1                | 3                | 4   | 0                 | 4                 | 3243.2332                       | 0.0040                         |
| 2  | 0                | 2                | 1   | 1                 | 1                 | 3293.4864                       | 0.0013                         |
| 2  | 2                | 1                | 2   | 1                 | 2                 | 3421.0004                       | -0.0023                        |
| 6  | 3                | 3                | 6   | 2                 | 4                 | 3660.094                        | 0.0052                         |
| 6  | 2                | 4                | 6   | 1                 | 5                 | 3665.228                        | -0.0020                        |
| 7  | 3                | 4                | 7   | 2                 | 5                 | 3708.483                        | 0.0014                         |
| 2  | 1                | 2                | 1   | 1                 | 1                 | 3878.5427                       | 0.0036                         |
| 5  | 3                | 2                | 5   | 2                 | 3                 | 3908.9209                       | 0.0021                         |
| 3  | 2                | 2                | 3   | 1                 | 3                 | 3935.0608                       | -0.0062                        |
| 2  | 0                | 2                | 1   | 0                 | 1                 | 4119.0923                       | 0.0018                         |
| 3  | 2                | 2                | 3   | 0                 | 3                 | 4279.1002                       | -0.0038                        |
| 4  | 3                | 1                | 4   | 2                 | 2                 | 4288.1001                       | 0.0022                         |
| 2  | 1                | 1                | 1   | 1                 | 0                 | 4507.996                        | -0.0042                        |
| 3  | 3                | 0                | 3   | 2                 | 1                 | 4620.858                        | 0.0010                         |
| 4  | 2                | 3                | 4   | 1                 | 4                 | 4626.5661                       | 0.0049                         |
| 2  | 1                | 2                | 1   | 0                 | 1                 | 4704.1443                       | -0.0001                        |
| 4  | 2                | 3                | 4   | 0                 | 4                 | 4798.954                        | -0.0058                        |
| 3  | 3                | 1                | 3   | 2                 | 2                 | 4956.7762                       | -0.0024                        |
| 4  | 3                | 2                | 4   | 2                 | 3                 | 5135.8011                       | 0.0003                         |
| 3  | 0                | 3                | 2   | 1                 | 2                 | 5431.7885                       | 0.0005                         |
| 5  | 3                | 3                | 5   | 2                 | 4                 | 5459.439                        | -0.0051                        |
| 5  | 2                | 4                | 5   | 1                 | 5                 | 5480.2012                       | 0.0025                         |
| 7  | 4                | 3                | 7   | 3                 | 4                 | 5646.3659                       | -0.0035                        |
| 3  | 1                | 3                | 2   | 1                 | 2                 | 5775.8281                       | 0.0031                         |
| 3  | 0                | 3                | 2   | 0                 | 2                 | 6016.8418                       | -0.0002                        |
| 6  | 4                | 2                | 6   | 3                 | 3                 | 6149.316                        | 0.0030                         |
| 3  | 2                | 2                | 2   | 2                 | 1                 | 6289.8866                       | -0.0027                        |
| 3  | 1                | 3                | 2   | 0                 | 2                 | 6360.8789                       | -0.0001                        |
| 3  | 2                | 1                | 2   | 2                 | 0                 | 6562.9311                       | 0.0002                         |
| 3  | 1                | 2                | 2   | 1                 | 1                 | 6708.7057                       | -0.0012                        |
| 6  | 1                | 5                | 6   | 0                 | 6                 | 5883.7272                       | -0.0004                        |
| 6  | 3                | 4                | 6   | 2                 | 5                 | 5954.8264                       | -0.0027                        |

<sup>[a]</sup>  $\Delta\nu = \nu_{\text{exp}} - \nu_{\text{cacl}}$ .

**Point S1.** We estimate the anticipated signal-to-noise ratio of the strongest transition of **Type 1** monohydrate, **III-1** (the global minimum) using the following steps.

1. The *strongest* observed transition of **I-10** in the experimental region is 202-101 at 4119.0923 MHz with a signal-to-noise ratio of 181 and that of **II-9** is 202-101 at 3998.9497 MHz with a signal-to-noise ratio of 167. The corresponding line intensities of **I-10** and **II-9** predicted, using Pgopher with the experimentally determined spectroscopic constants, the calculated permanent electric dipole moment components, and an estimated rotational temperature of 1 K, are 0.0082 and 0.0085 (arbitrary unit), respectively.
2. The *strongest* transition on the non-observed **Type 1** structure, the global minimum **III-1** structure, is 110-000 at 4111.99 MHz whose Pgopher predicted line intensity is 0.000135 (arbitrary unit).
3. The experimental abundance ratio of the *trans*- versus *cis*-THFA monomer is about 10 : 1~2. We use a ratio of 10 : 1.5 below for simplicity.

It is known from the “argon-test” experiments reported in Ref. 32 that the conversion from **III** to **I** and **II** rarely happens in a jet expansion. The barrier of conversion from **Type 1** (or more specifically **III-1**) to **Type 2** (**II-9** and **I-10**) remains high and the conversion from **Type 1** to **Type 2** structures can be considered as forbidden in a jet expansion, as discussed in detail in the main text. The anticipated (upper limit) signal-to-noise ratio of the strongest transition of **III-1** can be estimated based on the above information:

$$\begin{aligned} 181 \times (1.5/10) \times (0.000135/0.0082) &\approx 0.4 \text{ based on } \mathbf{I-10} \\ 167 \times (1.5/10) \times (0.000135/0.0085) &\approx 0.4 \text{ based on } \mathbf{II-9} \end{aligned}$$

The above numbers justify why we were not able to detect **III-1**, the global minimum.
